# Supplementary material for: Cation-placement control in double-perovskite GdBaCo2O6 and its impact on magnetism via spin-state modification
Source: Royal Society of Chemistry journal article supplement (doi:10.1039/d4tc01498g), 2024-01-01
Supplement: d4tc01498g1.pdf [file d4tc01498g1.pdf]

Supporting information for:

**Cation placement control in double-perovskite  $\text{GdBaCo}_2\text{O}_6$  and its impact  
on magnetism via spin-state modification**

Tsukasa Katayama<sup>1,2\*</sup>, Kento Magara<sup>3</sup>, Shiro Sakai<sup>4</sup>, Yijie Zeng<sup>4</sup>, Akira Chikamatsu<sup>5</sup>, Tetsuya  
Hasegawa<sup>3</sup>

<sup>1</sup>Research Institute for Electronic Science, Hokkaido University, Sapporo, Hokkaido, 001-0020,  
Japan

<sup>2</sup>JST-PRESTO, Kawaguchi, Saitama 332-0012, Japan

<sup>3</sup>Department of Chemistry, The University of Tokyo, Bunkyo-ku, Tokyo 113-0033, Japan

<sup>4</sup>Center for Emergent Matter Science, RIKEN, Wako, Saitama 351-0198, Japan

<sup>5</sup>Department of Chemistry, Faculty of Science, Ochanomizu University, 2-1-1 Otsuka, Bunkyo-ku,  
Tokyo 112-8610, Japan

E-mail: katayama@es.hokudai.ac.jp

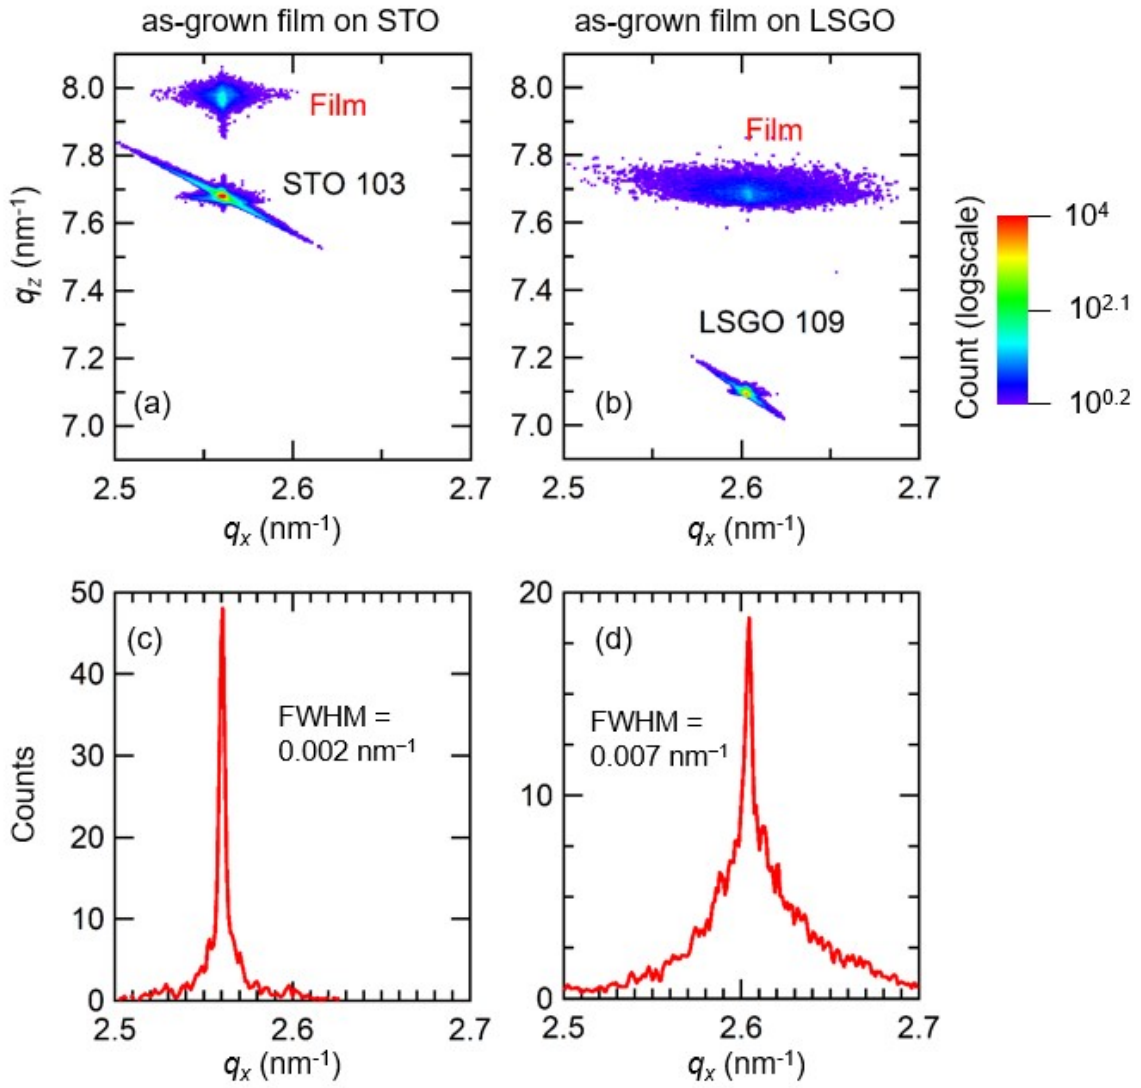

**Figure S1.** Reciprocal space mapping (RSM) and the  $q_x$ -direction dependence of the peak intensity of the films obtained from the RSM for the as-grown films on (a,c) STO and (b,d) LSGO substrates.

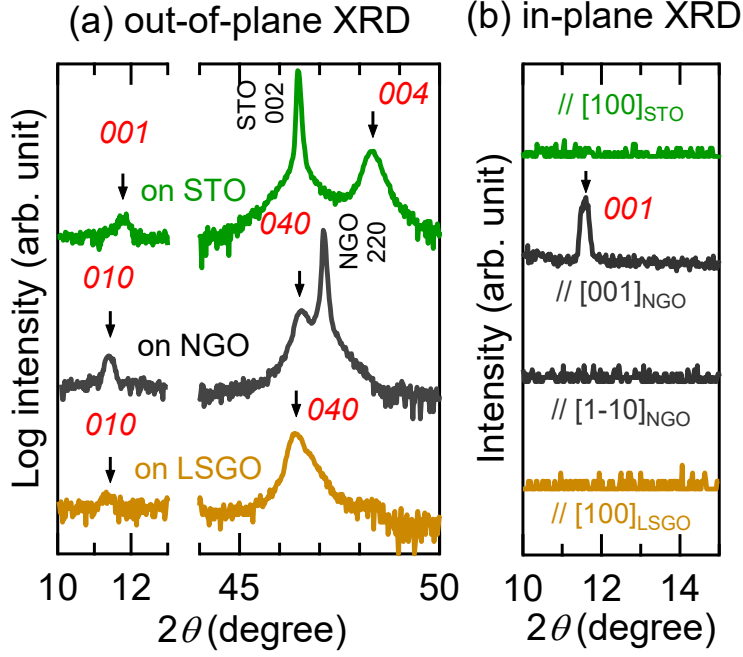

**Figure S2.** (a) Out-of-plane and (b) in-plane XRD  $2\theta$ - $\theta$  patterns for the GdBaCo<sub>2</sub>O<sub>5.5</sub> films on the SrTiO<sub>3</sub>(001), NdGaO<sub>3</sub>(110), and LaSrGaO<sub>4</sub>(001) substrates. We also prepared GdBaCo<sub>2</sub>O<sub>5.5</sub> thin films on NdGaO<sub>3</sub>(110) substrates (NGO) and conducted out-of-plane and in-plane XRD measurements using the same XRD equipment as for the other films grown on STO and LSGO. NGO has a rectangular in-plane lattice with lattice parameters of  $[1-10] = 7.729 \text{ \AA}$  and  $[001] = 7.710 \text{ \AA}$ . Because of this, the GdBaCo<sub>2</sub>O<sub>5.5</sub> film exhibited an orthorhombic structure; the in-plane lattice was fixed in the  $[001]_{\text{NGO}}$  direction but relaxed in the  $[1-10]_{\text{NGO}}$  direction, resulting in out-of-plane ( $7.811 \text{ \AA}$ ) and in-plane ( $7.729$  and  $7.635 \text{ \AA}$ ) lattice constants. Due to these anisotropic lattice constants, the film on NGO showed both the 010 and 001 superlattice peaks in the out-of-plane and in-plane  $[001]_{\text{NGO}}$   $2\theta$ - $\theta$  patterns, respectively. On the other hand, no superlattice peak was detected in the in-plane  $[1-10]_{\text{NGO}}$  pattern. Thus, when high ionic ordering exists in the films, superlattice peaks can be observed using our XRD system. However, we utilized our laboratory's XRD equipment without employing techniques such as synchrotron radiation. Therefore, while the degree of ordering is low, there is a possibility that the films still have some short-range ionic ordering.

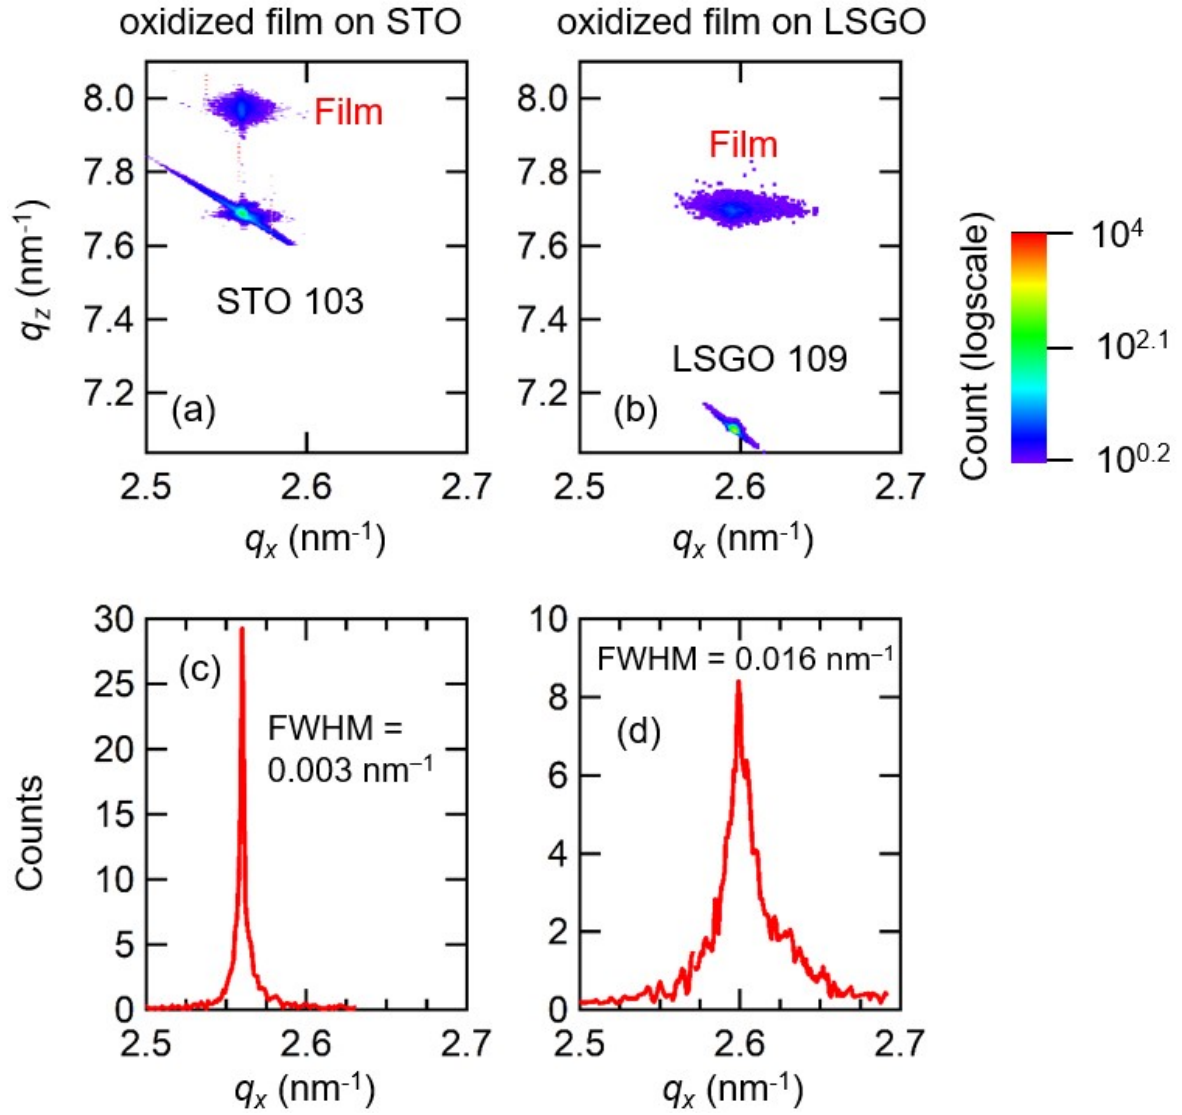

**Figure S3.** Reciprocal space mapping (RSM) and the  $q_x$ -direction dependence of the peak intensity of the films obtained from the RSM for the oxidized films on (a,c) STO and (b,d) LSGO substrates.

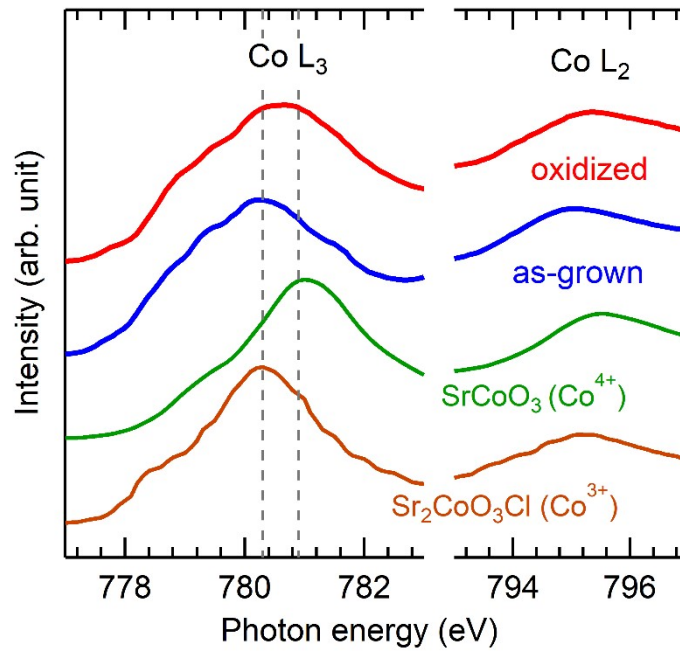

**Figure S4.** XAS Co  $L$ -edge spectra for the as-grown and oxidized  $\text{GdBaCo}_2\text{O}_x$  films grown on STO substrates. The figure also includes the reference spectra of  $\text{Sr}_2\text{CoO}_3\text{Cl}$  with  $\text{Co}^{3+}$  and  $\text{SrCoO}_3$  with  $\text{Co}^{4+}$  [Guillou, F. *et al.*, *Phys. Rev. B* 2013, 87, 115114. Potze, R. H. *et al.*, *Phys. Rev. B* 1995, 51, 11501–11506. Katayama, T. *et al.*, *Chem. Mater.* 2023, 35, 1295.]. The photon energy of the Co  $L_3$ -edge peak for the as-grown film closely matches that of  $\text{Sr}_2\text{CoO}_3\text{Cl}$ , indicating that Co is trivalent in the as-grown film, thus confirming the chemical composition as  $\text{GdBaCo}_2\text{O}_{5.5}$ . Conversely, the photon energy of the Co  $L_3$ -edge peak for the oxidized film is centered between those of  $\text{Sr}_2\text{CoO}_3\text{Cl}$  and  $\text{SrCoO}_3$ , suggesting a mixture of  $\text{Co}^{3+}$  and  $\text{Co}^{4+}$  in the oxidized film, and hence indicating the composition as  $\text{GdBaCo}_2\text{O}_6$  with  $\text{Co}^{3.5+}$ . It is noted that determining Co spin states from XAS involves several challenges: (1) The XAS spectral shape depends not only on the spin state but also on the coordination environment. Since  $\text{GdBaCo}_2\text{O}_6$  has distorted  $\text{CoO}_6$  octahedra, it is difficult to compare with undistorted compounds like  $\text{LaCoO}_3$ . (2) Among the six possible states ( $\text{Co}^{3+}$  high-spin (HS),  $\text{Co}^{3+}$  intermediate-spin (IS),  $\text{Co}^{3+}$  low-spin (LS),  $\text{Co}^{4+}$  HS,  $\text{Co}^{4+}$  IS, and  $\text{Co}^{4+}$  LS), some reference data are still not available. Due to these reasons, it is extremely difficult to determine the spin state from XAS alone.

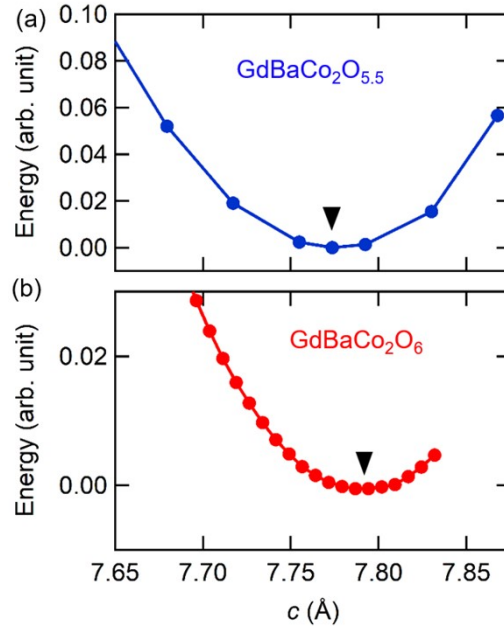

**Figure S5.** The relationship between the  $c$ -axis length and energy of  $\text{GdBaCo}_2\text{O}_{5.5}$  and  $\text{GdBaCo}_2\text{O}_6$ . Here, the  $a$ - and  $b$ -axis lengths were fixed at 3.905 Å.

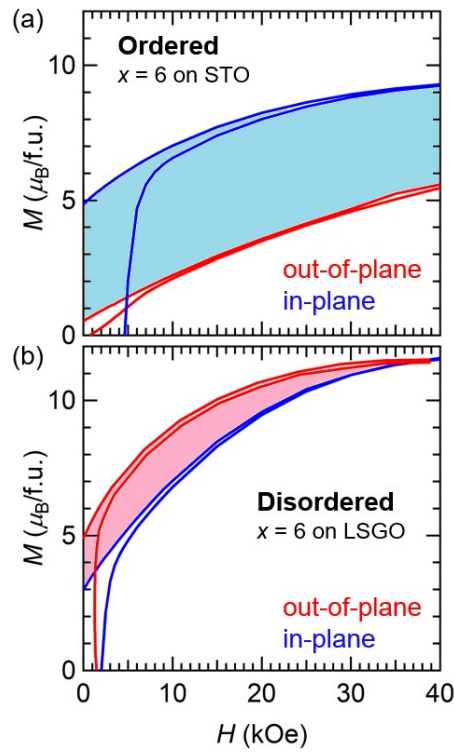

**Figure S6.** In-plane and out-of-plane  $M$ - $H$  curves for the (a) A-site-ordered  $x = 6$  film at 2 K and (b) A-site-disordered  $x = 6$  film at 5 K.

**Table S1.** The intensity ratio of the 001 to 006 peak ( $I_{001}/I_{006}$ ) for the as-grown and oxidized films on STO substrates, together with the simulation results.

|                   | Experimental         |                      | Simulation from the DFT calculation results      |                                                |
|-------------------|----------------------|----------------------|--------------------------------------------------|------------------------------------------------|
|                   | As-grown film on STO | oxidized film on STO | GdBaCo <sub>2</sub> O <sub>5.5</sub> film on STO | GdBaCo <sub>2</sub> O <sub>6</sub> film on STO |
| $I_{001}/I_{006}$ | 74.0 %               | 103 %                | 87.6 %                                           | 176 %                                          |
